# Supplementary material
Source: publisher figshare collection journal article supplement (https://diabetesjournals.figshare.com/articles/dataset/_/12824342)
Supplement: Supplementary file 3 [file 1]

## Supplemental Material

### Appendix 1:

#### Principal Investigators List for inTandem1

Andrew Ahmann, Oregon Health & Science University, Portland, OR, USA; Buki Ajala, LMC Diabetes and Endocrinology, Calgary, Alberta, Canada; Laura Akright, Northeast Endocrinology Associates, PA, Schertz, TX, USA; Amer Al-Karadsheh, The Endocrine Center Research Consultants, Houston, TX, USA; Hani Alasaad, LMC Diabetes and Endocrinology, Barrie, Ontario, Canada; Stephen Aronoff, Research Institute of Dallas, , Dallas, TX, USA; Ronnie Aronson, LMC Diabetes and Endocrinology, Toronto, Ontario, Canada; Timothy Bailey, AMCR Institute, Inc., Escondido, CA, USA; Arti Bhan, Henry Ford Hospital, Detroit, MI, USA; Bruce Bode, Atlanta Diabetes Associates, Atlanta, GA, USA; John Buse, UNC Health Care System, Chapel Hill, NC, USA; Tira Chaica Brom, Texas Diabetes and Endocrinology, Austin, TX, USA; Mark Christiansen, Diablo Clinical Research, Walnut Creek, CA, USA; Elena Christofides, Endocrinology Associates, Inc, Columbus, OH, USA; Jay Cohen, The Endocrine Clinic, PC, Memphis, TN, USA; Thomas Elliott, Vancouver General Hospital, Vancouver, BC, Canada; Norman Fishman, Diabetes Endocrinology Specialists, Inc., Chesterfield, MO, USA; David Fitz-Patrick, East-West Medical Research Institute, Honolulu, HI, USA; Juan Pablo, Frias, National Research Institute, Los Angeles, CA, USA; Satish Garg, Barbara Davis Center, University of Colorado Denver, Aurora, CO, USA; W. Timothy Garvey, University of Alabama at Birmingham, Birmingham, AL, USA; Linda Gaudiani, Marin Endocrine Care and Research, Inc., Greenbrae, CA, USA; Gregg Gerety, AMC Division of Community Endocrinology, Albany, NY, USA; Ronald Goldenberg, LMC Diabetes and Endocrinology, Thornhill, Ontario, Canada; Carl Griffin, Lynn Health Science Institute (LHSI), Oklahoma City, OK, USA; Yehuda Handelsman, Metabolic Institute of America, Tarzana, CA, USA; Priscilla Hollander, Baylor Endocrine Center, Dallas, TX, USA; Barry Horowitz, Metabolic Research Institute, Inc., West Palm Beach, FL, USA; Irene Hramiak, St. Joseph's Health Care, London, Ontario, Canada; David Huffman, University Diabetes & Endocrine Consultants, Chattanooga, TN, USA; Michael Jardula, Desert Oasis Healthcare Medical Group, Palm Springs, CA, USA; Erin Keely, Ottawa Hospital, Riverside Campus, Ottawa, Ontario, Canada; Leslie Klaff, Rainier Clinical Research Center, Renton, WA, USA; David Klonoff, Mills-Peninsula Health Services, San Mateo, CA, USA; Wendy Lane, Mountain Diabetes and Endocrine Center, Asheville, NC, USA; James Larocque, Virginia Endocrinology Research, Chesapeake, VA, USA; Philip Levin, Model Clinical Research, , Baltimore, MD, USA; Carol Levy, Icahn School of Medicine at Mount Sinai, New York, NY, USA; William Litchfield, Desert Endocrinology, Henderson, NV, USA; Kathryn Lucas, Diabetes & Endocrinology Consultants, Morehead City, NC, USA; Ivy-Joan Madu, Diabetes Associates Medical Group, Orange, CA, USA; Hiralal Maheshwari, Midwest Endocrinology, Crystal Lake, IL, USA; Ronald Mayfield, Mountainview Clinical Research, Greer, SC, USA; Janet McGill, Washington University School of Medicine in St. Louis, St. Louis, MO, USA; Wendell Miers, Kentucky Diabetes Endocrinology Center, Lexington, KY, USA; Frank Mikell, Springfield Diabetes and Endocrine Center, Springfield, IL, USA; Samer Nakhle, Palm Medical Group, Las Vegas, NV, USA; Ola Odugbesan, Physicians Research Associates, LLC, Lawrenceville, GA, USA; Rakesh Patel, Endocrine and Psychiatry Center, Houston, TX, USA; Athena Philis-Tsimikas, Scripps Whittier Diabetes Institute, La Jolla, CA, USA; Antonio Pinero-Pilona, Suncoast Clinical Research, New Port Richey, FL, USA; David

Podlecki, IMMUNOe International Research Centers, Longmont, CO, USA; Zubin Punthakee, McMaster University, Hamilton, Ontario, Canada; Remi Rabasa-Lhoret, Institut de Recherches Cliniques de Montréal (IRCM), Montreal, Quebec, Canada; Thomas Ransom, Nova Scotia Health Authority, Halifax, Nova Scotia, Canada; John Reed, Endocrine Research Solutions, Inc., Roswell, GA, USA; Michael Reeves, Private Practice, Chattanooga, TN, USA; Marc Rendell, Creighton University Medical Center, Omaha, NE, USA; Thomas Repas, Regional Health Clinical Research, Rapid City, SD, USA; Paul Rosenblit, Diabetes Lipid Management and Research Center, Huntington Beach, CA, USA; Julio Rosenstock, Dallas Diabetes and Endocrine Center, Dallas, TX, USA; Katarzyna Sadurska, Eastern Maine Medical Center, Bangor, ME, USA; Senan Sultan, East Coast Institute for Research, Fleming Island, FL, USA; David Sutton, Northeast Florida Endocrine & Diabetes Associates, Jacksonville, FL, USA; James Thrasher, Medical Investigations, Inc., Little Rock, AR, USA; Elena Toschi, Joslin Diabetes Center, Boston, MA, USA; Subbulaxmi Trikudanathan, University of Washington Medical Center, Seattle, WA, USA; Shyjauddin Valika, Associates in Endocrinology, Elgin, IL, USA; Joanna Van, Diabetes Research Center, Tustin, CA, USA; Arnold Vera, Peninsula Research Inc., Ormond Beach, FL, USA; Khurram Wadud, East Coast Institute for Research, Jacksonville, FL, USA; Michelle Welch, Diabetes and Metabolism Specialists, San Antonio, TX, USA; Vincent Woo, Diabetes Research Group, Winnipeg, Manitoba, Canada; Alan Wynne, Cotton-O'Neil Clinical Research Center, Topeka, KS, USA; Zeina Yared, LMC Diabetes and Endocrinology, Ville Saint-Laurent, Quebec, Canada

## **Principal Investigators List for inTandem2**

Pascale Abrams, Sint-Vincentiusziekenhuis, Antwerpen, Belgium; Mazin Alhakim, EB Flevoresearch BV, Almere, Netherlands; Jean-Michel Andrieu, Centre Hospitalier de Béziers, Béziers, France; Emiliya Apostolova, MHAT “Bratan Shukerov” AD, Department of Endocrinology, Smolyan, Bulgaria; Kristina Baltramonaityene, JSC “Kristavita,” Jonava, Lithuania; Lina Barsiene, JSC “Saules Seimos Medicinos Centras,” Kaunas, Lithuania; Thomas Behnke, Diabetes Competence Center Neuwied, Neuwied, Germany; Oľga Beňušová, BENROD, s.r.o., Diabetologická ambulancia, Štúrovo, Slovakia; Geremia Brunetto Bolli, Ospedale Santa Maria della Misericordia, Perugia, Italy; James Boyle, Glasgow Clinical Research Facility, Glasgow, United Kingdom; Michael Brändle, KS St. Gallen Klinik für Endokrinologie, Diabetologie, Osteologie und Stoffwechselerkrankungen, St. Gallen, Switzerland; Helmut Brath, Ordination, Vienna, Austria; Bertrand Cariou, CHU de Nantes Hôpital Guillaume & René Laennec CIC Endocrino-Nutrition, Nantes, France; Martin Clodi, Konventhospital der Barmherzigen Brüder, Abteilung für Innere Medizin, Linz, Austria; Silviana Constantinescu, Medcon S.R.L., Buzau, Romania; Peter Coremans, AZ Nikolaas, SINT-NIKLAAS, Belgium; Carmen Crisan, SC MEDIAB SRL, Targu Mures, Romania; Dominik Dahl, Gemeinschaftspraxis fuer Innere Medizin, Hamburg, Germany; Thomas Danne, Diabeteszentrum für Kinder und Jugendliche Kinder- und Jugendkrankenhaus auf der Bult, Hannover, Germany; Melanie Davies, University Hospitals of Leicester NHS Trust Leicester Diabetes Centre, Leicester, United Kingdom; Christophe De Block, UZ Antwerpen, Edegem, Belgium; Carmen De La Cuesta Mayor, Clinica Nuevas Tecnologias, Sevilla, Spain; Harold de Valk, University Medical Center Utrecht, Utrecht, Netherlands; Corinne DeBroye, UZ Brussel, Brussel, Belgium; Stefano Del Prato, Azienda Ospedaliero Universitaria Pisana—Stabilimento di Cisanello, Pisa, Italy; Aleksi Delchev, Multifprofile Hospital for Active Treatment—Prof. Dr.

Paraskev Stoyanov AD, Lovech, Bulgaria; Frank Dellanna, DaVita Clinical Research Deutschland GmbH, Duesseldorf, Germany; Maurizio Di Mauro, AOU Policlinico-Vittorio Emanuele—Centro Diabetologico, Catania, Italy; Viera Doničová, HUMAN-CARE, s.r.o., Diabetologická a metabolická ambulancia, Kosice, Slovakia; Mihaly Dudas, Békés Megyei Pándy Kálmán Korhaz, Gyula, Hungary; Santiago Duran, HUS Virgen de Valme, Sevilla, Spain; Jaroslav Fábry, DIAFA, s.r.o., Diabetologická ambulancia, Bratislava, Slovakia; Peter Fasching, Wilhelminenspital, Vienna, Austria; Juan Carlos Ferrer, Hospital General de Valencia, Valencia, Spain; Migle Francaite-Daugeliene, JSC “Klinikiniai sprendimai,” Alytus, Lithuania; Edward Franek, Centralny Szpital MSW, Warszawa, Poland; Pieter Gillard, UZ Leuven, Leuven, Belgium; Carla Giordano, AOU Policlinico Paolo Giaccone di Palermo—Endocrinologia e Malattie Metaboliche, Palermo, Italy; Ramon Gomis de Barbara, Hospital Clínic de Barcelona, Barcelona, Spain; Peter Grant, Leeds Teaching Hospital NHS Trust, The LIGHT Laboratories, Leeds, United Kingdom; Elwira Gromniak, Indywidualna Specjalistyczna Praktyka Lekarska dr n. med., Szczecin, Poland; Andrea Grosz, Budai Irgalmasrendi Korhaz, Budapest, Hungary; Simon Heller, Sheffield Teaching Hospitals NHS Foundation Trust, Northern General Hospital, Sheffield, United Kingdom; Adriana Ilavská, Medispektrum s.r.o., Diabetologická ambulancia, Bratislava, Slovakia; Andrew Johnson, Clinical Research Centre, North Bristol NHS Trust, Southmead Hospital, Bristol, United Kingdom; Małgorzata Józefowska, Centrum Terapii Współczesnej J.M. Jasnorzewska Spółka Komandytowo-Akcyjna, Łódź, Poland; Katarzyna Jusiak, Centrum Medyczne AMED, Warszawa, Poland; Neli Klyuchkova, Diagnostic-Consultative Centre “Equita” EOOD, Varna, Bulgaria; Shlomit Koren Spiegelstein, Assaf Harofeh Medical Center, Tzrifin, Israel; Ewa Krzyżagórska, Praktyka Lekarska Ewa Krzyżagórska, Poznań, Poland; Zohar Landau, Wolfson Medical Center, Holon, Israel; Georgi Levterov, Multiprofile Hospital for Active Treatment, Kaspela EOOD, Plovdiv, Bulgaria; Bernhard Ludvik, Krankenanstalt Rudolfstiftung, Vienna, Austria; Angel Marinchev, Multiprofile Hospital for Active Treatment “Sveta Anna” Sofia AD, Sofia, Bulgaria; Nicoleta Mihaela Mindrescu, Nicodiab S.R.L., Bucuresti, Romania; Mariola Minkina-Pędras, CARE CLINIC Sp.z o.o., Katowice, Poland; Cristina Victoria Mistodie, CMI Dr. Mistodie Cristina Victoria, Galati, Romania; Mitko Mitkov, UMHAT “Sveti Georgi” EAD, Clinic of Endocrinology and Metabolic Diseases, Plovdiv, Bulgaria; Cristobal Morales, Hospital Virgen Macarena, Sevilla, Spain; Ofri Mosenzon, Hadassah University Medical Center, Jerusalem, Israel; Alina Mot, S.C. Gensan S.R.L. Policlinica Astra, SIBIU, Romania; Judit Nádas, Bajcsy-Zsilinszky Hospital 3rd Medical Department, Budapest, Hungary; Valerica Nafornta, SC Minimed SRL—Diabet Zaharat, Nutritie si Boli Metabolice, Bacau, Romania; Partheepan Narendaren, University Hospitals Birmingham NHS Foundation Trust, Queen Elizabeth Hospital, Birmingham, United Kingdom; Tamas Oroszlan, Zala County Hospital, Zalaegerszeg, Hungary; Attila Pálinkás, Csongrád Megyei Egészségügyi Ellátó Központ, Hodmezovasarhely, Hungary; Ewa Pańkowska, Instytut Diabetologii Sp. z o.o., Warszawa, Poland; Bjoern Paschen, Diabetologische Schwerpunktpraxis Harburg, Hamburg, Germany; Marlena Pascu, S.C. Nutrilife S.R.L., Bucuresti, Romania; Andreas Pfützner, Pfützner Science & Health Institute, Diabeteszentrum & Praxis, Mainz, Germany; Moshe Phillip, Schneider Children's Medical Center of Israel, Petah Tikva, Israel; Orit Pinhas-Hamiel, Sheba Medical Center, Tel Hashomer, Israel; Radovan Plášil, IRIDIA, s.r.o., Diabetologická ambulancia, Vrútky, Slovakia; Paolo Pozzilli, Università Campus Bio-Medico di Roma, Rome, Italy; Rudolf PRAGER, Krankenhaus Hietzing, Vienna, Austria; Camelia Pruna, SC Grandmed SRL, Oradea, Romania; Irina Purtokaite Labutiniene, Klaipeda University Hospital, Klaipeda, Lithuania; Miguel Quesada,

Hospital Clinico San Cecilio, Granada, Spain; Shenaz Ramtoola, East Lancashire Hospitals NHS Trust, Royal Blackburn Hospital, Blackburn, United Kingdom; Margarita Rivas, Hospital Infanta Luisa, Sevilla, Spain; Michel Rodier, CHU de Nîmes, Centre Hospitalier Universitaire Caremeau, Nîmes, France; Ludger Rose, Institut fuer Diabetesforschung Muenster GmbH, Muenster, Germany; Staffan Salmonsson, Öbackakliniken, Härnösand, Sweden; Ildiko Sasvari, Egeszsegugyi Kospont Szakrendelő Intézet II. em 21., Budapest, Hungary; Marina Scavini, IRCCS Ospedale San Raffaele, Milan, Italy; Mariette Schoofs, Albert Schweitzer Hospital, Dordrecht, Netherlands; Naim Shehadeh, Rambam Health Care Campus, Haifa, Israel; Rafael Simo, Hospital De La Vall D'herbron, Barcelona, Spain; Ewa Skokowska, NZOZ Przychodnia Specjalistyczna Medica, Lublin, Poland; Antoanela Slavcheva Petrova—Gancheva, MHAT-Ruse AD, Second Department of Internal Diseases, Ruse, Bulgaria; Albert Szocs, Szocs Depot Kft., Budapest, Hungary; Bengt-Olov Tengmark, Citydiabetes, Stockholm, Sweden; Miriam Teplanová, FUNKYSTUFF, s.r.o., Diabetologická ambulancia, Nové Zámky, Slovakia; Ingemar Thorstensson, Medicinklinikens Forskningsenhet, Kristianstad, Sweden; Francisco Tinahones, Hospital General Universitario de Málaga-Hospital Virgen de la Victoria, Malaga, Spain; Lidia Tokarska, LANDA—Specjalistyczne Gabinety Lekarski, Kraków, Poland; Leonas Valius, Hospital of Lithuanian University of Health Sciences Kaunas Klinikos, Kaunas, Lithuania; Bruno Verges, CHU du Bocage, Dijon, France; Peter Voros, Fővárosi Önkormányzat Egyesített Szent István és Szent László Kórház—Rendelőintézet, II. Belgyógyászati Osztály, Budapest, Hungary; Julio Wainstein, Diabetes Medical Center, Tel Aviv, Israel

## **Appendix 2: Inclusion/Exclusion Criteria**

### *Main Inclusion Criteria:*

- Patient had given written informed consent to participate in the study in accordance with local regulations.
- Adult patients, 18 years and older, with a diagnosis of type 1 diabetes made at least 1 year prior to informed consent.
- Patients who were being treated with insulin or insulin analog delivered via continuous subcutaneous insulin infusion or multiple daily injections.
- Willing and able to perform self-monitoring of blood glucose and complete the study diary as required per protocol.
- At the Screening Visit, A1C must have been between 7.0% (53 mmol/mol) and 11.0% (97 mmol/mol), inclusive.
- Females of childbearing potential must have been using an adequate method of contraception and have had a negative pregnancy test.

### *Main Exclusion Criteria:*

- Use of any antidiabetic agent other than insulin or insulin analog at the time of Screening.
- Use of sodium-glucose cotransporter inhibitors within 8 weeks prior to Screening.
- Chronic systemic corticosteroid use.
- Type 2 diabetes mellitus, or severely uncontrolled type 1 diabetes as determined by the Investigator.

### **Appendix 3: Mitigation Plan for Reduction of Risk of DKA in Clinical Trials of Sotagliflozin**

Based on the known experience with SGLT2 inhibitors in type 2 diabetes, steps were taken to ensure that possible DKA was detected as early as possible and interventions employed. The steps taken in the sotagliflozin type 1 diabetes clinical development program included the following:

- Exclusion of patients with a history of recent (i.e., within the month prior to Screening) or recurrent DKA (i.e., more than 2 episodes in the 6 months prior to Screening)
- Information outlining the risk of DKA in the Investigator Brochure and patient informed consent form
- Guidance in the protocols on the recognition and management of DKA (e.g., the potential for occurrence with normal or minimally elevated blood glucose); the potential for masking of DKA symptoms; the need to measure blood or urine ketones in patients presenting with gastrointestinal complaints or other symptoms suggestive of intercurrent illness (i.e., “sick rules”); instructions for the management of ketosis or ketoacidosis with rapid acting insulin via syringe, according to a specified algorithm, until normalization; and fluid and supplemental oral glucose intake.
- Reinforcement of DKA messages via letters to all Investigators and Study Coordinators outlining the risk mitigation plan for DKA in October 2015 with supplemental site training sessions
- Dissemination of communication cards (“wallet cards”) to all patients with information about recognizing and treating ketosis

## Sotagliflozin Pooled Analysis of DKA

- Provision of dipstick urine ketone tests (e.g., Ketostix®) and, later, point-of-care BHB meters to allow early and active patient evaluation of ketosis at symptom onset
- Blood BHB assessment at every clinic visit (central laboratory and point-of-care), with central laboratory alerts for BHB >0.6 mmol/L to ensure appropriate clinical follow-up of patients
- Ongoing review of the rate of DKA in a blinded fashion, supported by the following:
  - Multifaceted approach to ensure complete capture of all potential DKA cases, including Investigator-reported metabolic acidosis/DKA; ongoing laboratory monitoring of BHB elevations; medical monitoring of reported AEs using broad “trigger terms” to identify potential unreported metabolic acidosis/DKA cases
  - Use of specialized eCRF pages by Investigators to capture all pertinent information regarding potential DKA
  - Blinded adjudication of all metabolic acidosis cases and DKA cases by the CEC to confirm the presence of DKA cases using a uniform definition, and to define the level of evidence supporting this adjudication decision

#### Appendix 4: Identification of DKA/Metabolic Acidosis

The occurrence of DKA was based on evaluation of the following:

- Absence of typical presenting signs and symptoms did not preclude the diagnosis of DKA
- Elevated blood or urine ketones with specific emphasis on the presence of increased concentration of plasma BHB
- Metabolic acidosis evidenced by the presence of decreased serum bicarbonate concentration, increased anion gap, and decreased blood pH
- Absence of associated hyperglycemia documented by SMBG or plasma glucose testing did not preclude the diagnosis of DKA

All cases of potential metabolic acidosis and DKA were classified using the following scale:

- **Yes, with certainty:** There is sufficient evidence to support such an event.
- **Yes, probably:** The role of other factors could not be excluded (e.g., underlying disease, complications, other medical events, concomitant drugs, or concurrent treatment).
- **No, unlikely:** An alternative explanation is plausible and more likely (e.g., underlying disease, complications, other medical events, concomitant drugs, or concurrent treatment).
- **No, with certainty:** This is a manifestation of other clinical factors or circumstances (e.g., underlying disease, complications, other medical events, concomitant drugs, or concurrent treatment).
- **Unclassifiable:** The clinical characteristics and circumstances related to the event did not allow classification.
- **Insufficient Data:** The information available was inadequate to allow for classification.



## Supplemental Tables

Supplemental Table S1. Baseline characteristics and demographics.

|                                                | <b>Placebo</b><br><b>(N = 526)</b> | <b>Sotagliflozin 200</b><br><b>mg/day</b><br><b>(N = 524)</b> | <b>Sotagliflozin 400</b><br><b>mg/day</b><br><b>(N = 525)</b> |
|------------------------------------------------|------------------------------------|---------------------------------------------------------------|---------------------------------------------------------------|
| <b>Age, years</b>                              | 42.5 (13.3)                        | 44.4 (13.7)                                                   | 44.0 (13.4)                                                   |
| <b>Female, n (%)</b>                           | 255 (48.5)                         | 259 (49.4)                                                    | 272 (51.8)                                                    |
| <b>Race: White, n (%)</b>                      | 494 (93.9)                         | 493 (94.1)                                                    | 496 (94.5)                                                    |
| <b>Diabetes duration, years</b>                | 21.2 (12.0)                        | 21.6 (12.5)                                                   | 21.5 (12.3)                                                   |
| <b>CSII, n (%)</b>                             | 226 (43.0)                         | 224 (42.7)                                                    | 224 (42.7)                                                    |
| <b>BMI, kg/m<sup>2</sup></b>                   | 28.5 (5.3)                         | 28.9 (5.6)                                                    | 28.7 (5.2)                                                    |
| <b>Weight, kg</b>                              | 84.3 (17.6)                        | 84.5 (18.1)                                                   | 84.2 (18.1)                                                   |
| <b>HbA<sub>1c</sub>, % [mmol/mol]</b>          | 7.7 (0.8)<br>[6.3]                 | 7.7 (0.8)<br>[6.3]                                            | 7.6 (0.8)<br>[6.3]                                            |
| <b>Total daily insulin, IU/kg</b>              | 0.75 (0.33)                        | 0.73 (0.34)                                                   | 0.73 (0.30)                                                   |
| <b>Median BHB, mmol/L</b><br><b>(min, max)</b> | 0.13 (0.10, 3.33)                  | 0.13 (0.10, 1.46)                                             | 0.14 (0.10, 1.75)                                             |

Data are mean (standard deviation) unless otherwise specified.

CSII: continuous subcutaneous insulin infusion; BMI: body mass index; BHB: beta-hydroxybutyrate (Note: for BHB, the lower limit of detection was 0.10 mmol/L).

**Supplemental Table S2.** Effect of percent change in total daily insulin dose on the incidence of investigator-reported DKA/metabolic acidosis events.

|                                                                    | <b>Placebo</b>               | <b>Sotagliflozin<br/>200 mg</b> | <b>Sotagliflozin<br/>400 mg</b> |
|--------------------------------------------------------------------|------------------------------|---------------------------------|---------------------------------|
| <b>Total insulin dose (IU/kg) reduction <math>\geq 10\%</math></b> |                              |                                 |                                 |
| <b>Yes</b>                                                         | 1.7<br>(2.2, 3.3)<br>n = 309 | 7.1<br>(4.3, 9.8)<br>n = 376    | 9.1<br>(6.0, 12.2)<br>n = 394   |
| <b>No</b>                                                          | 1.1<br>(0.0, 2.5)<br>n = 212 | 4.0<br>(0.5, 7.5)<br>n = 141    | 5.3<br>(1.1, 9.5)<br>n = 124    |
| <b>Total insulin dose (IU/kg) reduction <math>\geq 20\%</math></b> |                              |                                 |                                 |
| <b>Yes</b>                                                         | 0<br><br>n = 157             | 5.8<br>(2.6, 8.9)<br>n = 236    | 10.8<br>(6.4, 15.0)<br>n = 242  |
| <b>No</b>                                                          | 2.1<br>(0.6, 3.7)<br>n = 364 | 6.7<br>(1.0, 8.1)<br>n = 281    | 5.9<br>(4.1, 7.2)<br>n = 276    |

Exposure-adjusted incidence rate reported as events per 100 patient-years (95% CI)

**Supplemental Table S3.** Summary of potential contributing trigger factors for positively-adjudicated DKA events.

|                                                                        | <b>Placebo</b> | <b>Sotagliflozin</b> |
|------------------------------------------------------------------------|----------------|----------------------|
| <b>Positively-adjudicated DKA events, n of events</b>                  | 1              | 36                   |
| <b>Potential Trigger Factors* n</b>                                    |                |                      |
| <b>Insulin reduction/<br/>missed insulin dose</b>                      | 0              | 6                    |
| <b>Insulin pump<br/>interruption</b>                                   | 0              | 13                   |
| <b>Concomitant illness<br/>(infection, injuries, or<br/>surgeries)</b> | 1              | 14                   |
| <b>Alcohol within 24<br/>hours of event</b>                            | 0              | 2                    |
| <b>Strenuous exercise</b>                                              | 0              | 1                    |
| <b>No clear trigger factor<br/>identified</b>                          | 0              | 3                    |

Data are number of events and proportion of events meeting criteria.

\* Some events had more than one potential trigger factors.

**Supplemental Table S4.** Adjudicated DKA by study in the Sotagliflozin Type 1 Diabetes Clinical Program.\*

| <b>Study Number (Name)</b>  | <b>Placebo</b> | <b>Sotagliflozin</b> | <b>Sotagliflozin</b> | <b>Sotagliflozin</b> |
|-----------------------------|----------------|----------------------|----------------------|----------------------|
| <b>Duration (Reference)</b> |                | <b>75 mg</b>         | <b>200 mg</b>        | <b>400 mg</b>        |
| <b>204 (inTandem 5)</b>     | N = 42         |                      |                      | N = 43               |
| <b>12 weeks (1)</b>         | 1 (2.4)        |                      |                      | 0                    |
| <b>206 (inTandem 4)</b>     | N = 36         | N = 35               | N = 35               | N = 35               |
| <b>12 weeks (2)</b>         | 0              | 0                    | 0                    | 1 (2.9)              |
| <b>309 (inTandem1)</b>      | N = 268        |                      | N = 263              | N = 262              |
| <b>52 weeks (3)</b>         | 1 (0.4)        |                      | 9 (3.4)              | 11 (4.2)             |
| <b>310 (inTandem2)</b>      | N = 258        |                      | N = 261              | N = 263              |
| <b>52 weeks (4)</b>         | 0              |                      | 6 (2.3)              | 9 (3.4)              |
| <b>312 (inTandem3)</b>      | N = 703        |                      |                      | N = 699              |
| <b>24 weeks (5)</b>         | 4 (0.6)        |                      |                      | 21 (3.0)             |
| <b>Total</b>                | N = 1,307      | N = 35               | N = 559              | N = 1,302            |
| <b>Adjudicated DKA n</b>    | 6 (0.5)        | 0                    | 15 (2.7)             | 42 (3.2)             |
| <b>(%)</b>                  |                |                      |                      |                      |

Cells filled with black denotes dose not evaluated in specific study.

\*203 (Sands et al. Diabetes Care) is not included because formal adjudication process was not implemented at the time of this trial (2 DKA events were reported with sotagliflozin 400 mg and 0 with placebo).

## **Supplemental Figures**

### **Supplemental Figure S1.** Changes in the DKA Risk Mitigation Strategy

### **Supplemental Figure S2.** Annualized DKA incidence before, during, and after implementation of the enhanced risk mitigation plan.\*

\*The enhanced risk mitigation plan included: 1) distribution of point-of-care BHB meters and testing strips to all patients; 2) revision of patient wallet cards with instructions regarding the need for ketone monitoring and correction and not relying on elevated blood glucose to suspect DKA; 3) a protocol amendment emphasizing the importance of patient adherence to urine and blood ketone monitoring (to be used for screening and confirmation, respectively); and 4) the need for early notification of study site investigators in the event of BHB elevation.

**Supplemental Figure S3.** Box plot of beta-hydroxybutyrate (mmol/L) with (A) Placebo, (B) Sotagliflozin 200 mg, and (C) Sotagliflozin 400 mg over 52 weeks.

Note: The box represents the 1st to 3rd quartiles, box width varies according to number of patients in each group. The horizontal line within the box is the median. The “+” is the mean. The whiskers extend to the most extreme observations within 1.5 times the interquartile range from the nearest quartile. Outliers >1.5 times the interquartile range are displayed as individual datapoints.

## References for Supplemental Appendix

1. Bode BW, Banks P, Sawhney S, Strumph P, The Sotagliflozin JDRF Study Writing Group. Efficacy and safety of sotagliflozin, a dual SGLT1 and SGLT2 inhibitor, as adjunct to insulin in young adults with poorly controlled type 1 diabetes (JDRF Study). *Diabetologia*. 2017;60(Suppl 1):S1-S608.
2. Baker C, Wason S, Banks P, et al. Dose-dependent glycometabolic effects of sotagliflozin on type 1 diabetes over 12 weeks: the inTandem4 trial. *Diabetes Obes Metab*. 2019;21(11):2440-2449.
3. Buse JB, Garg SK, Rosenstock J, et al. Sotagliflozin in combination with optimized insulin therapy in adults with type 1 diabetes: the North American inTandem1 study. *Diabetes Care*. 2018;41(9):1970-1980.
4. Danne T, Cariou B, Banks P, et al. HbA1c and hypoglycemia reductions at 24 and 52 weeks with sotagliflozin in combination with insulin in adults with type 1 diabetes: the European inTandem2 study. *Diabetes Care*. 2018;41(9):1981-1990.
5. Garg SK, Henry RR, Banks P, et al. Effects of sotagliflozin added to insulin in patients with type 1 diabetes. *N Engl J Med*. 2017;377(24):2337-2348.
